# Supplementary material for: The Post-transcriptional Regulator rsmA/csrA Activates T3SS by Stabilizing the 5′ UTR of hrpG, the Master Regulator of hrp/hrc Genes, in Xanthomonas
Source: PubMed Central journal article supplement (PMC3937308; doi:10.1371/journal.ppat.1003945), 2014-02-27
Supplement: ppat.1003945.s001.pdf [file ppat.1003945.s001.pdf]

**Figure S1.**

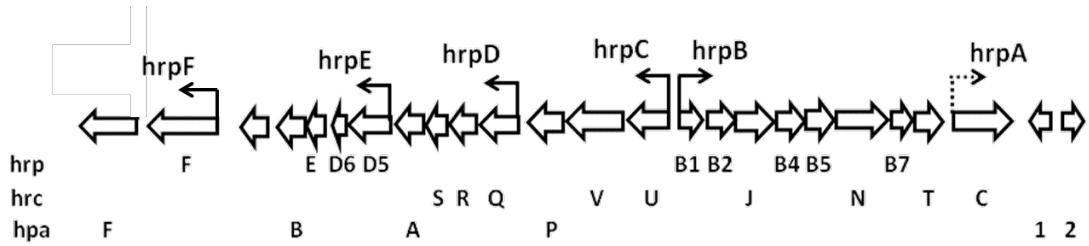

**Figure S1. Genetic organization of *hrp* gene clusters of *X. citri* subsp. *citri*.** The open reading frames which form the transcript units in *hrp* cluster, *hrpA* to *hrpF*, are represented by thick arrows in the map. The PIP boxes positions in each transcript unit and their orientations are indicated by thin arrows, except for *hrpA* which does not contain a PIP box, orientation of the promoter is shown with dashed arrows. *hrc* genes encode proteins conserved among type 3 secretion systems; *hrp* and *hpa* genes encode non-conserved proteins involved with hypersensitive response and pathogenicity.
