# Supplementary material for: The Post-transcriptional Regulator rsmA/csrA Activates T3SS by Stabilizing the 5′ UTR of hrpG, the Master Regulator of hrp/hrc Genes, in Xanthomonas
Source: PubMed Central journal article supplement (PMC3937308; doi:10.1371/journal.ppat.1003945), 2014-02-27
Supplement: ppat.1003945.s002.pdf [file ppat.1003945.s002.pdf]

**Figure S2.**

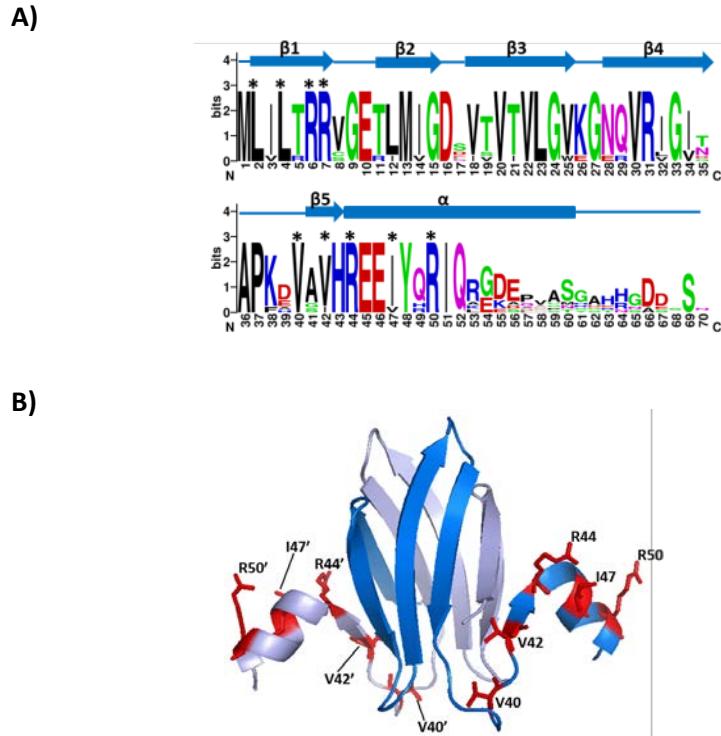

**Figure S2. Graphical representation of the multiple sequence alignment and structural model of RsmA of *Xanthomonas citri* subsp. *citri*.** **A)** Sequences of RsmA homologous proteins were used to generate this representation using the WebLogo server (<http://weblogo.berkeley.edu/>) [110], in which the height of the residue symbol indicates the degree of conservation and the numbers refer to residue positions in RsmA. RsmA secondary structure was predicted by Phyre (<http://www.sbg.bio.ic.ac.uk/~phyre/>) [49]. In the predicted XCC RsmA secondary structure, boxes indicate alpha-helices and arrows indicate  $\beta$ -strand motifs. **B)** The RsmA structure model was obtained using the Swiss-Model Repository program with the *E. coli* CsrA structure as a model [PDB: 1Y00, [47]]. The structure was generated using PyMOL [111]. The critical residues involved in RNA binding are highlighted in A) with stars and in B) with sticks in the RsmA three-dimensional structure model [32,33].
