# Supplementary material for: The Post-transcriptional Regulator rsmA/csrA Activates T3SS by Stabilizing the 5′ UTR of hrpG, the Master Regulator of hrp/hrc Genes, in Xanthomonas
Source: PubMed Central journal article supplement (PMC3937308; doi:10.1371/journal.ppat.1003945), 2014-02-27
Supplement: ppat.1003945.s003.pdf [file ppat.1003945.s003.pdf]

**Figure S3.**

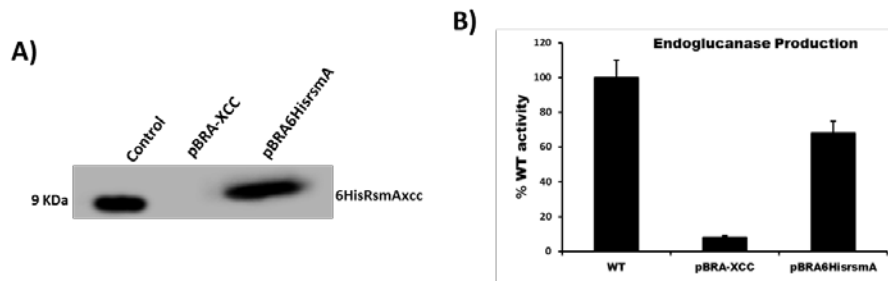

**Figure S3. Induced expression of 6HisRsmA restores the production levels of endoglucanases in *rsmA* mutant of *X. citri* subsp. *citri*.** **A)** Expression of 6HisRsmA upon induction with 0.25% L-arabinose was confirmed by Western-blot analysis with anti-6His antiserum. *X. citri* subsp. *citri* strains were grown in XVM2 medium at 28°C and OD<sub>600nm</sub> 0.5, and after 4 hours of induction with 0.25% L-arabinose the cells were collected and centrifuged. Supernatants were discarded and cells were resuspended in Laemmli sample buffer. Proteins extracted were analyzed by SDS-PAGE, transferred to nitrocellulose membrane and incubated with anti-6His antiserum. *E. coli* cell extract expressing the recombinant protein 6HisRsmA was used as a positive control. **B)** Induced expression of 6HisRsmA restores the production levels of endoglucanases in *rsmA* mutant of *X. citri* subsp. *citri*. Endoglucanase activity assays were performed with supernatant of the strains grown in NB medium supplemented with 0.25% L-arabinose at 28 °C and OD<sub>600nm</sub> 1.0. (Slater et al. 2000; Ryan et al. 2010). Wt, XCC strain 306; pBRA, mutant *rsmA* harboring empty plasmid pBRA; pBRA6HisrsmA, *rsmA* mutant transformed with plasmid-borne 6HisrsmA under control of an arabinose induced promoter.
