# Supplementary material for: The Post-transcriptional Regulator rsmA/csrA Activates T3SS by Stabilizing the 5′ UTR of hrpG, the Master Regulator of hrp/hrc Genes, in Xanthomonas
Source: PubMed Central journal article supplement (PMC3937308; doi:10.1371/journal.ppat.1003945), 2014-02-27
Supplement: ppat.1003945.s004.pdf [file ppat.1003945.s004.pdf]

**Table S1. Bacterial strains and plasmids used in this study.**

| Strain or plasmid                         | Relevant characteristics                                                                                                                                              | Reference                      |
|-------------------------------------------|-----------------------------------------------------------------------------------------------------------------------------------------------------------------------|--------------------------------|
| <b>Strains</b>                            |                                                                                                                                                                       |                                |
| <i>Escherichia coli</i>                   |                                                                                                                                                                       |                                |
| DH5a                                      | F <sup>-</sup> <i>recA</i> (r <sub>K</sub> <sup>-</sup> , m <sub>K</sub> <sup>+</sup> ) <i>hsdR17</i> (rΔ <i>(lacZYA-argF)</i> Φ80 <i>dlacZ</i> ΔM15                  | New England Biolabs            |
| BL21 Star (DE3) pLysS                     | F <sup>-</sup> <i>ompT</i> <i>hsdSB</i> (r <sub>B</sub> <sup>-</sup> m <sub>B</sub> <sup>-</sup> ) <i>gal</i> <i>dem</i> <i>me131</i> (DE3) pLysS (Cam <sup>r</sup> ) | Life Invitrogen                |
| <i>X. citri</i> subsp. <i>citri</i> (XCC) |                                                                                                                                                                       |                                |
| 306 (A)                                   | Wild type, amp <sup>r</sup> , rif <sup>r</sup>                                                                                                                        | Da Silva <i>et al.</i> , 2002. |
| Δ <i>rsmA</i>                             | In frame deletion of <i>rsmA</i> also named <i>csrA</i>                                                                                                               | This study                     |
| Δ <i>hrpG</i>                             | <i>hrpG</i> mutant                                                                                                                                                    | Guo <i>et al.</i> , 2011.      |
| pBRA-XCC                                  | Empty pBRA plasmid (Broad Range Arabinose inducible promoter) in the Δ <i>rsmA</i> background                                                                         | This study                     |
| pBRARsmA                                  | pBRA expressing 6His <i>rsmA</i> under control of arabinose inducible promoter in the Δ <i>rsmA</i> background                                                        | This study                     |
| Wt- <i>hrpG</i> -6His                     | Wild-type strain carrying the construct <i>hrpG</i> -6His inserted in its chromosome by using an integrative plasmid pPM7g                                            | This study                     |
| Δ <i>rsmA</i> - <i>hrpG</i> -6His         | Δ <i>rsmA</i> strain carrying the construct <i>hrpG</i> -6His inserted in its chromosome by using an integrative plasmid pPM7g                                        | This study                     |
| Wt- <i>hrcQ</i> -Flag                     | Wild-type strain carrying the construct <i>hrcQ</i> -Flag inserted in its chromosome by using an integrative plasmid pPM7g                                            | This study                     |
| Δ <i>rsmA</i> - <i>hrcQ</i> -Flag         | Δ <i>rsmA</i> strain carrying the construct <i>hrcQ</i> -Flag inserted in its chromosome by using an integrative plasmid pPM7g                                        | This study                     |
| <b>Plasmids</b>                           |                                                                                                                                                                       |                                |
| pGEM-T easy                               | PCR cloning vector, Ap <sup>r</sup>                                                                                                                                   | Promega                        |
| pGEMT-5UTRhrpG                            | 5' untranslated region of <i>hrpG</i> cloned in pGEM-Teasy                                                                                                            | This study                     |
| pGEMT-5UTRhrpD                            | 5' untranslated region of <i>hrpD</i> operon cloned in pGEM-Teasy                                                                                                     | This study                     |
| pGEMT-5UTRhrpE                            | 5' untranslated region of <i>hrpE</i> operon cloned in pGEM-Teasy                                                                                                     | This study                     |
| pNTPS138                                  | Suicide vector for generation of gene knockouts, <i>sacB</i> and Km <sup>r</sup>                                                                                      | M. R. Alley, unpublished       |
| pNPTS-rsmA                                | pNTPS138 derivative for generation of <i>rsmA</i> knockout, <i>sacB</i> and Km <sup>r</sup>                                                                           | This study                     |
| pET28a(+)                                 | <i>E. coli</i> expression vector, Km <sup>r</sup>                                                                                                                     | Novagen                        |
| pET-6HisrsmA                              | <i>rsmA</i> cloned into pET28a <sub>Ndel/HindIII</sub>                                                                                                                | This study                     |
| pBRA                                      | Vector for gene overexpression containing arabinose-inducible promoter P(BAD), Spc <sup>r</sup> and Str <sup>r</sup>                                                  | M. Marroquin, unpublished      |
| pBRA6HisrsmA                              | pBRA derivative encoding 6HisRsmA                                                                                                                                     | This study                     |
| pUFR047                                   | Broad host range vector, Gm <sup>r</sup>                                                                                                                              | De Feyter <i>et al.</i> , 1993 |
| pUFRrsmA                                  | pUFR047 derivative encoding RsmA                                                                                                                                      | This study                     |
| pUFRrsmA-flag                             | pUFR047 derivative encoding RsmA-Flag                                                                                                                                 | This study                     |
| pUFRhrpG                                  | pUFR047 derivative encoding HrpG                                                                                                                                      | This study                     |
| pB1 121                                   | Binary vector containing <i>gusA</i> , Km <sup>r</sup>                                                                                                                | Clontech                       |
| pLAFR3                                    | Broad host range cloning vector, Tc <sup>r</sup>                                                                                                                      | Huynh <i>et al.</i> , 1989     |
| pLAFRhrpG::gus                            | pLAFR3 expressing a HrpG- <i>gusA</i> fusion under control of <i>hrpG</i> native promoter                                                                             | This study                     |
| pLAFRhrpX::gus                            | pLAFR3 expressing a HrpX- <i>gusA</i> fusion under control of <i>hrpX</i> native promoter                                                                             | This study                     |
| pLAFRhrpA::gus                            | pLAFR3 expressing a HrcC- <i>gusA</i> fusion under control of <i>hrpA</i> native promoter                                                                             | This study                     |
| pLAFRhrpB::gus                            | pLAFR3 expressing a HrpB1- <i>gusA</i> fusion under control of <i>hrpB</i> operon native promoter                                                                     | This study                     |
| pLAFRhrpC::gus                            | pLAFR3 expressing a HrcU- <i>gusA</i> fusion under control of <i>hrpC</i> operon native promoter                                                                      | This study                     |
| pLAFRhrpD::gus                            | pLAFR3 expressing a HrcQ- <i>gusA</i> fusion under control of <i>hrpD</i> operon native promoter                                                                      | This study                     |
| pLAFRhrpE::gus                            | pLAFR3 expressing a HrpD5- <i>gusA</i> fusion under control of <i>hrpE</i> operon native promoter                                                                     | This study                     |
| pBBR1-MCS-5                               | Broad host range vector, Gm <sup>r</sup>                                                                                                                              | Kovach <i>et al.</i> , 1995    |
| pBBELac-hrpG6his                          | pBBR derivative encoding HrpG-6His under control of LAC promoter                                                                                                      | This study                     |
| pBBRLac-hrpGD41N6his                      | pBBR derivative encoding HrpGD41N6His under control of LAC promoter                                                                                                   | This study                     |
| pBBRLac-hrpGE44K6his                      | pBBR derivative encoding HrpGE44K6His under control of LAC promoter                                                                                                   | This study                     |
| pBBRLac-hrpGD60N6his                      | pBBR derivative encoding HrpGD60N6His under control of LAC promoter                                                                                                   | This study                     |
| pPM7g                                     | Integrative plasmid containing a fragment <i>amy106-912</i> , Km <sup>r</sup>                                                                                         | Martins <i>et al.</i> , 2010   |
| pPM7-hrpG6-His                            | pPM7g derivative encoding HrpG-6His under control of its native promoter                                                                                              | This study                     |
| pPM7-hrcQ-Flag                            | pPM7g derivative encoding HrcQ-Flag under control of <i>hrpD</i> operon native promoter                                                                               | This study                     |
| pUC18-mini-Tn7T-LAC                       | Suicide delivery vector and mini-Tn7 elements, Ap <sup>r</sup> and Gm <sup>r</sup>                                                                                    | Choi <i>et al.</i> , 2005      |
| pTNS2                                     | Helper vector                                                                                                                                                         | Choi <i>et al.</i> , 2005      |
| Tn7T-LAC-hrpG-GUS                         | pUC18-mini-Tn7T-LAC expressing a <i>hrpG</i> 5' UTR- <i>gusA</i> fusion under control of LAC promoter                                                                 | This study                     |
| Tn7T-LAC-hrpB-GUS                         | pUC18-mini-Tn7T-LAC expressing a <i>hrpB</i> 5' UTR- <i>gusA</i> fusion under control of                                                                              | This study                     |

---

|                   |                                                                                                                          |            |
|-------------------|--------------------------------------------------------------------------------------------------------------------------|------------|
| Tn7T-LAC-hrpC-GUS | LAC promoter<br>pUC18-mini-Tn7T-LAC expressing a <i>hrpC</i> 5' UTR- <i>gusA</i> fusion under control of<br>LAC promoter | This study |
| Tn7T-LAC-hrpD-GUS | pUC18-mini-Tn7T-LAC expressing a <i>hrpD</i> 5' UTR- <i>gusA</i> fusion under control of<br>LAC promoter                 | This study |
| Tn7T-LAC-hrpE-GUS | pUC18-mini-Tn7T-LAC expressing a <i>hrpE</i> 5' UTR- <i>gusA</i> fusion under control of<br>LAC promoter                 | This study |

---

Ap<sup>r</sup>, ampicillin-resistant; Gm<sup>r</sup>, gentamycin-resistant; Km<sup>r</sup>, kanamycin-resistant; Spc<sup>r</sup>, spectinomycin-resistance; Str<sup>r</sup>, streptomycin-resistance; Tc<sup>r</sup>, tetracycline-resistance.
