# Supplementary material for: The Post-transcriptional Regulator rsmA/csrA Activates T3SS by Stabilizing the 5′ UTR of hrpG, the Master Regulator of hrp/hrc Genes, in Xanthomonas
Source: PubMed Central journal article supplement (PMC3937308; doi:10.1371/journal.ppat.1003945), 2014-02-27
Supplement: ppat.1003945.s005.pdf [file ppat.1003945.s005.pdf]

**Table S2. Comparison of expression of the genes regulated by *rsmA* in *Xanthomonas citri* subsp. *citri*. using microarray.**

| Locus tag | Gene name                       | Log <sub>2</sub> ratio of fold change ( $\Delta rsmA/WT$ ) <sup>a</sup> | Log <sub>2</sub> ratio of fold change (pBRArsmA/pBRA) <sup>b</sup> | Product description                           |
|-----------|---------------------------------|-------------------------------------------------------------------------|--------------------------------------------------------------------|-----------------------------------------------|
|           |                                 | <b>Down-regulated</b>                                                   | <b>Up-regulated</b>                                                |                                               |
| XAC0035   | -                               | -1.01                                                                   | 2.37                                                               | hypothetical                                  |
| XAC0076   | <i>avrBS2</i>                   | -1.00                                                                   | 2.17                                                               | putative type 3 secretion effector            |
| XAC0104   | -                               | -1.09                                                                   | 2.37                                                               | metalloprotease                               |
| XAC0105   | -                               | -1.10                                                                   | -                                                                  | hypothetical                                  |
| XAC0155   | -                               | -1.13                                                                   | 2.32                                                               | Trehalose synthase                            |
| XAC0224   | <i>poxB</i>                     | -1.05                                                                   | 1.98                                                               | pyruvate dehydrogenase                        |
| XAC0225   | <i>ntrB</i>                     | -1.15                                                                   | 2.76                                                               | histidine kinase                              |
| XAC0226   | <i>ntrC</i>                     | -1.20                                                                   | 3.63                                                               | response regulator                            |
| XAC0239   | -                               | -1.40                                                                   | -                                                                  | hypothetical                                  |
| XAC0277   | <i>xopR</i>                     | -2.10                                                                   | 2.8                                                                | putative type 3 secretion effector            |
| XAC0286   | <i>xopE1</i>                    | -1.80                                                                   | 2.68                                                               | putative type 3 secretion effector            |
| XAC0393   | <i>hpaF</i><br>( <i>xopAE</i> ) | -1.41                                                                   | 2.58                                                               | type 3 secretion effector                     |
| XAC0394   | <i>hrpF</i>                     | -1.23                                                                   | 2.79                                                               | type 3 secretion protein HrpF                 |
| XAC0396   | <i>hpaB</i>                     | -1.13                                                                   | 3.31                                                               | type 3 secretion protein HpaB                 |
| XAC397    | <i>hrpE</i>                     | -1.44                                                                   | 2.65                                                               | type 3 secretion protein HrpE                 |
| XAC0398   | <i>hrpD6</i>                    | -1.30                                                                   | 2.87                                                               | type 3 secretion protein HrpD6                |
| XAC0399   | <i>hrpD5</i>                    | -1.56                                                                   | 3.50                                                               | type 3 secretion protein HrpD5                |
| XAC0400   | <i>hpaA</i>                     | -1.25                                                                   | 3.58                                                               | type 3 secretion protein HpaA                 |
| XAC0401   | <i>hrcS</i>                     | -1.31                                                                   | 3.62                                                               | type 3 secretion protein HrcS                 |
| XAC0402   | <i>hrcR</i>                     | -1.41                                                                   | 3.53                                                               | type 3 secretion protein HrcR                 |
| XAC0403   | <i>hrcQ</i>                     | -1.73                                                                   | 3.98                                                               | type 3 secretion protein HrcQ                 |
| XAC0404   | <i>hpaP</i>                     | -1.10                                                                   | 3.37                                                               | type 3 secretion protein HpaP                 |
| XAC0405   | <i>hrcV</i>                     | -1.26                                                                   | 3.35                                                               | type 3 secretion protein HrcV                 |
| XAC0406   | <i>hrcU</i>                     | -1.40                                                                   | 3.78                                                               | type 3 secretion protein HrcU                 |
| XAC0407   | <i>hrpB1</i>                    | -1.37                                                                   | 3.48                                                               | type 3 secretion protein HrpB1                |
| XAC0408   | <i>hrpB2</i>                    | -1.32                                                                   | 3.92                                                               | type 3 secretion protein HrpB2                |
| XAC0409   | <i>hrcJ</i>                     | -1.82                                                                   | 3.91                                                               | type 3 secretion protein HrcJ                 |
| XAC0410   | <i>hrpB4</i>                    | -1.75                                                                   | 4.05                                                               | type 3 secretion protein HrpB4                |
| XAC0411   | <i>hrpB5</i>                    | -1.46                                                                   | 4.12                                                               | type 3 secretion protein HrpB5                |
| XAC0412   | <i>hrcN</i>                     | -1.23                                                                   | 3.78                                                               | type 3 secretion protein HrcN                 |
| XAC0413   | <i>hrpB7</i>                    | -1.17                                                                   | 4.02                                                               | type 3 secretion protein HrpB7                |
| XAC0414   | <i>hrcT</i>                     | -1.00                                                                   | 3.96                                                               | type 3 secretion protein HrcT                 |
| XAC0415   | <i>hrcC</i>                     | -1.06                                                                   | 2.51                                                               | type 3 secretion protein HrcC                 |
| XAC0416   | <i>hpa1</i>                     | -1.72                                                                   | 3.28                                                               | type 3 secretion protein Hpa1                 |
| XAC0417   | <i>Hpa2</i>                     | -1.13                                                                   | 2.53                                                               | type 3 secretion protein Hpa2                 |
| XAC0435   | <i>virK</i>                     | -1.08                                                                   | 2.15                                                               | VirK                                          |
| XAC0494   | -                               | -1.10                                                                   | -                                                                  | histidine kinase                              |
| XAC0501   | -                               | -1.24                                                                   | 2.96                                                               | hypothetical                                  |
| XAC0543   | <i>xopX</i>                     | -1.15                                                                   | 2.52                                                               | hypothetical                                  |
| XAC0601   | <i>xopV</i>                     | -                                                                       | 2.01                                                               | putative type 3 secretion effector            |
| XAC0637   | <i>hslV</i>                     | -1.18                                                                   | 1.67                                                               | ATP-dependent protease peptidase subunit      |
| XAC0638   | <i>hslU</i>                     | -1.29                                                                   | 1.73                                                               | ATP-dependent protease ATP-binding subunit    |
| XAC0644   | -                               | -1.12                                                                   | -                                                                  | diguanylate cyclase                           |
| XAC0754   | <i>xopI</i>                     | -1.28                                                                   | 2.87                                                               | putative type 3 secretion effector            |
| XAC0878   | <i>pcaH</i>                     | -1.05                                                                   | 3.33                                                               | protocatechuate 4.5-dioxygenase subunit beta  |
| XAC0879   | <i>ligA</i>                     | -1.00                                                                   | 3.49                                                               | protocatechuate 4.5-dioxygenase subunit alpha |
| XAC0880   | <i>pcaQ</i>                     | -1.12                                                                   | 3.01                                                               | transcriptional regulator                     |
| XAC0916   | -                               | -1.09                                                                   | 2.37                                                               | hydrolase                                     |
| XAC1124   | -                               | -1.13                                                                   | 2.52                                                               | hypothetical                                  |

|          |                  |                    |                      |                                             |
|----------|------------------|--------------------|----------------------|---------------------------------------------|
| XAC1171  | <i>stkxacI</i>   | -1.13              | 2.37                 | serine/threonine kinase                     |
| XAC1172  | -                | -1.32              | 3.40                 | hypothetical                                |
| XAC1208  | <i>xopP</i>      | -1.07              | 3.43                 | putative type 3 secretion effector          |
| XAC1211  | <i>katE</i>      | -1.04              | 2.54                 | catalase                                    |
| XAC1242  | <i>pthX</i>      | -1.06              | -                    | pathogenicity-related protein               |
| XAC1265  | <i>hrpG</i>      | -1.23              | 1.32                 | OmpR transcriptional regulator              |
| XAC1266  | <i>hrpX</i>      | -1.18              | 1.41                 | AraC transcriptional regulator              |
| XAC1319  | <i>algU</i>      | -1.05              | 2.81                 | sigma factor RpoE                           |
| XAC1354  | -                | -1.05              | -                    | hypothetical                                |
| XAC1525  | <i>tyrA</i>      | -1.36              | 2.05                 | prephenate dehydrogenase                    |
| XAC1682  | <i>rpoE</i>      | -                  | 2.68                 | Sigma factor RpoE                           |
| XAC1743  | <i>csrA/rsmA</i> | -5.38              | 4.62                 | post-transcriptional regulator              |
| XAC2053  | <i>tex</i>       | -1.08              | 2.89                 | transcription-related protein               |
| XAC2164  | -                | -1.73              | 2.03                 | hypothetical                                |
| XAC2165  | -                | -1.46              | 2.15                 | isochorismatase                             |
| XAC2166  | -                | -1.58              | 1.85                 | AraC transcriptional regulator              |
| XAC2399  | <i>htpX</i>      | -1.42              | 1.96                 | heat shock protein HtpX                     |
| XAC2528  | <i>hptG</i>      | -1.38              | -                    | heat shock protein HtpG                     |
| XAC2786  | <i>xopN</i>      | -1.51              | 3.61                 | type 3 secretion effector                   |
| XAC2853  | -                | -1.25              | 1.63                 | cysteine protease                           |
| XAC2922  | <i>hrpW</i>      | -1.21              | 1.88                 | type 3 secretion protein HrpW               |
| XAC2946  | -                | -1.80              | -                    | hypothetical                                |
| XAC3085  | <i>xopK</i>      | -1.47              | 3.89                 | putative type 3 secretion effector          |
| XAC3090  | <i>xopL</i>      | -                  | 3.01                 | putative type 3 secretion effector          |
| XAC3230  | <i>xopAI</i>     | -1.10              | 1.51                 | putative type 3 secretion effector          |
| XAC3647  | <i>pheA</i>      | -1.44              | 3.29                 | Chorismate mutase                           |
| XAC3666  | <i>xopAK</i>     | -1.06              | 2.41                 | putative type 3 secretion effector          |
| XAC3683  | -                | -1.00              | 1.97                 | histidine kinase                            |
| XAC3685  | -                | -1.27              | 2.41                 | hypothetical                                |
| XAC3878  | -                | -1.22              | -                    | disulphide-isomerase                        |
| XAC4213  | <i>xopAD</i>     | -1.31              | 3.37                 | putative type 3 secretion effector          |
| XAC4235  | -                | -1.36              | -                    | hypothetical                                |
| XAC4269  | -                | -1.20              | 2.53                 | hypothetical                                |
| XAC4327  | <i>uahA</i>      | -1.17              | 3.69                 | allophanate hydrolase                       |
| XAC4333  | <i>xopQ</i>      | -1.18              | 2.64                 | putative type 3 secretion effector          |
| XACb0011 | <i>xopE3</i>     | -1.08              | 2.12                 | putative type 3 secretion effector          |
|          |                  | <b>Upregulated</b> | <b>Downregulated</b> |                                             |
| XAC0028  | <i>egl</i>       | 3.05               | -5.35                | cellulase                                   |
| XAC0298  | -                | 1.10               | -                    | hypothetical                                |
| XAC0346  | <i>celA</i>      | 2.11               | -4.6                 | cellulase                                   |
| XAC0466  | -                | 1.64               | -3.70                | lytic enzyme                                |
| XAC0467  | -                | 1.12               | -3.62                | hypothetical                                |
| XAC0545  | <i>aroG</i>      | 1.42               | -2.01                | phospho-2-dehydro-3-deoxyheptonate aldolase |
| XAC0604  | <i>treA</i>      | 2.26               | -1.53                | trehalase                                   |
| XAC0827  | <i>nrtB</i>      | 1.65               | -4.31                | permease                                    |
| XAC0828  | <i>nrtCD</i>     | 1.82               | -4.46                | ABC transporter ATP-binding component       |
| XAC0829  | -                | 2.23               | -5.11                | ABC transporter substrate binding protein   |
| XAC0830  | <i>tauD</i>      | 2.08               | -5.15                | taurine dioxygenase                         |
| XAC0851  | <i>slfA</i>      | 1.25               | -5.01                | NADH-dependent FMN reductase                |
| XAC0868  | -                | 1.86               | -4.55                | hypothetical                                |
| XAC1034  | -                | -                  | -4.28                | peptidyl-Asp metalloendopeptidase           |
| XAC1145  | -                | 1.12               | -                    | hypothetical                                |
| XAC1200  | -                | 1.05               | -3.95                | prolyl oligopeptidase family protein        |
| XAC1264  | -                | 1.20               | -1.52                | hypothetical                                |
| XAC1284  | -                | -                  | -2.25                | response regulator protein                  |
| XAC1328  | -                | 1.98               | -4.34                | response regulator                          |
| XAC1397  | -                | 1.54               | -                    | padR transcriptional regulator              |
| XAC1426  | <i>ecpD</i>      | 2.85               | -3.94                | pili assembly chaperone                     |

|         |               |      |       |                                             |
|---------|---------------|------|-------|---------------------------------------------|
| XAC1427 | <i>pru</i>    | 2.14 | -5.21 | protein U                                   |
| XAC1495 | <i>cspA</i>   | -    | -3.94 | major cold shock protein                    |
| XAC1492 | -             | 2.16 | -5.03 | hypothetical                                |
| XAC1573 | <i>phoU</i>   | 2.65 | -2.05 | phosphate regulon transcriptional regulator |
| XAC1778 | -             | 1.44 | -4.28 | histidine kinase                            |
| XAC1779 | -             | 1.18 | -3.68 | hypothetical                                |
| XAC1877 | <i>rpfG</i>   | 2.26 | -1.50 | phosphodiesterase                           |
| XAC1878 | <i>rpfC</i>   | 1.07 | -     | histidine kinase                            |
| XAC1906 | <i>cheW</i>   | 1.78 | -2.94 | chemotaxis protein                          |
| XAC1907 | <i>parA</i>   | 2.20 | -3.46 | chromosome 3 partitioning protein           |
| XAC1909 | <i>motD</i>   | 1.72 | -     | flagellar motor protein MotD                |
| XAC1930 | <i>cheA</i>   | 1.42 | -4.03 | chemotaxis related protein                  |
| XAC1931 | <i>cheZ</i>   | 2.25 | -5.21 | chemotaxis related protein                  |
| XAC1932 | <i>cheY</i>   | 2.44 | -5.37 | chemotaxis protein                          |
| XAC1933 | <i>fliA</i>   | 2.33 | -5.12 | RNA polymerase sigma factor                 |
| XAC1934 | <i>fleN</i>   | 2.72 | -5.35 | flagellar biosynthesis switch protein       |
| XAC1935 | <i>flhF</i>   | 2.61 | -5.28 | flagellar biosynthesis regulator            |
| XAC1936 | <i>flhA</i>   | 2.20 | -3.84 | flagellar biosynthesis protein              |
| XAC1937 | <i>flhB</i>   | 1.80 | -2.32 | flagellar biosynthesis protein              |
| XAC1941 | <i>fliR</i>   | 2.18 | -1.71 | flagellar biosynthesis protein              |
| XAC1942 | <i>fliQ</i>   | 1.78 | -1.81 | flagellar biosynthesis protein              |
| XAC1944 | <i>fliP</i>   | 2.40 | -2.01 | flagellar biosynthesis protein              |
| XAC1945 | <i>fliO</i>   | 1.77 | -3.82 | flagellar protein                           |
| XAC1946 | <i>fliN</i>   | 2.29 | -3.79 | flagellar protein                           |
| XAC1947 | <i>fliM</i>   | 2.02 | -3.48 | flagellar protein                           |
| XAC1948 | <i>fliL</i>   | 1.83 | -3.04 | flagellar protein                           |
| XAC1949 | <i>fliK</i>   | 1.71 | -3.32 | flagellar protein                           |
| XAC1954 | <i>fliF</i>   | 1.56 | -2.84 | flagellar MS-ring protein                   |
| XAC1955 | <i>fliE</i>   | 1.69 | -4.12 | flagellar protein                           |
| XAC1965 | <i>acp</i>    | 1.82 | -1.83 | acyl carrier protein                        |
| XAC1966 | <i>vioA</i>   | 1.42 | -     | nucleotide sugar transaminase               |
| XAC1974 | <i>fliD</i>   | 1.44 | -4.07 | flagellar protein                           |
| XAC1975 | <i>fliC</i>   | 1.51 | -5.21 | flagellin                                   |
| XAC1976 | <i>flgL</i>   | 1.48 | -5.85 | flagellar hook-associated protein           |
| XAC1980 | <i>flgH</i>   | 1.42 | -5.48 | flagellar basal body L-ring protein         |
| XAC1983 | <i>flgE</i>   | 1.57 | -5.01 | flagellar hook protein FlgE                 |
| XAC1986 | <i>FlgB</i>   | 1.62 | -5.30 | flagellar basal body rod protein<br>FlgB    |
| XAC1990 | -             | 2.19 | -2.64 | hypothetical                                |
| XAC2135 | -             | 1.38 | -2.01 | hypothetical                                |
| XAC2151 | <i>yapH</i>   | 1.18 | -5.43 | Filamentous hemagglutinin-related protein   |
| XAC2250 | -             | 1.26 | -4.32 | hypothetical                                |
| XAC2443 | -             | 1.43 | -2.98 | hypothetical                                |
| XAC2463 | -             | 1.24 | -3.18 | hypothetical                                |
| XAC2529 | <i>rhsD</i>   | 1.72 | -5.43 | RhsD                                        |
| XAC2608 | <i>virB6</i>  | 2.47 | -3.31 | VirB6                                       |
| XAC2609 | -             | 2.81 | -4.01 | hypothetical                                |
| XAC2610 | -             | 2.23 | -3.92 | hypothetical                                |
| XAC2614 | <i>virB4</i>  | 1.52 | -2.18 | VirB4                                       |
| XAC2616 | <i>virB2</i>  | 2.44 | -4.71 | VirB2                                       |
| XAC2618 | <i>virB11</i> | 2.39 | -4.73 | VirB11                                      |
| XAC2619 | <i>virB10</i> | 1.98 | -5.23 | VirB10                                      |
| XAC2663 | -             | 1.07 | -3.37 | transposase                                 |
| XAC2664 | <i>pilE</i>   | 1.05 | -4.13 | PilE protein                                |
| XAC2774 | -             | 1.31 | -5.49 | TonB                                        |
| XAC2885 | -             | 1.86 | -1.57 | phospholipase A1                            |
| XAC2897 | -             | 1.97 | -     | diguanylate cyclase                         |
| XAC2992 | -             | 1.17 | -5.32 | endoproteinase Arg-C                        |
| XAC3031 | -             | 1.53 | -3.21 | histidine kinase                            |
| XAC3241 | <i>fimA</i>   | 1.31 | -5.61 | FimA                                        |

|          |             |      |       |                   |
|----------|-------------|------|-------|-------------------|
| XAC3262  | -           | 1.08 | -2.86 | hypothetical      |
| XAC3267  | -           | 1.12 | -2.18 | hypothetical      |
| XAC3279  | -           | 2.39 | -5.71 | hypothetical      |
| XAC3340  | <i>cysG</i> | 1.78 | -4.72 | siroheme synthase |
| XAC3380  | -           | 1.12 | -4.76 | hypothetical      |
| XAC3533  | -           | 1.83 | -2.83 | hypothetical      |
| XAC3634  | -           | 1.61 | -3.63 | hypothetical      |
| XAC3636  | -           | 2.10 | -2.71 | hypothetical      |
| XAC4011  | -           | 2.42 | -3.19 | hypothetical      |
| XAC4026  | -           | 2.01 | -4.31 | hypothetical      |
| XACa0013 | -           | 1.08 | -2.06 | hypothetical      |

<sup>a</sup>The Log<sub>2</sub>-fold change of each gene was derived from the comparison of *rsmA* mutant versus wild-type (p<0.05; Log<sub>2</sub>>=1). <sup>b</sup>The Log<sub>2</sub>-fold change of each gene was derived from the comparison of the  $\Delta rsmA$  mutant carrying the construct pBRArsmA and empty plasmid pBRA. Transcriptome analyses were performed with four independent biological samples for each condition.
