# Supplementary material for: The Post-transcriptional Regulator rsmA/csrA Activates T3SS by Stabilizing the 5′ UTR of hrpG, the Master Regulator of hrp/hrc Genes, in Xanthomonas
Source: PubMed Central journal article supplement (PMC3937308; doi:10.1371/journal.ppat.1003945), 2014-02-27
Supplement: ppat.1003945.s006.pdf [file ppat.1003945.s006.pdf]

**Table S3. Oligonucleotides primers used in this study.**

| Name                                                 | Sequence (5' to 3')                                  |
|------------------------------------------------------|------------------------------------------------------|
| <b>For mutant construction</b>                       |                                                      |
| F1ΔrsmA                                              | CACCTGAATTCGACTGCGCTTTGACTTCTCG                      |
| R1ΔrsmA                                              | CGGCGAAGCTTGAGGATCAACATTTGCAAATC                     |
| F2ΔrsmA                                              | ATCACGGCGACGATTCTTCGAAAGCTTTGATCG                    |
| R2ΔrsmA                                              | GGTTTTGGAATTCCTTGATCCTTACTCCTTGATGGTC                |
| <b>For Complementation</b>                           |                                                      |
| F-rsmAc                                              | CACCTGAATTCGACTGCGCTTTGACTTCTCG                      |
| R-rsmAc                                              | CTAACGTAAACCCTTGAATTC AACGATCAATTGGAAG               |
| F1-rsmAflag                                          | CTGGATCCCTTGTCGCTGGCGTGAACG                          |
| R1-rsmAflag                                          | CTTGTAATCATTGGAAGAATCGTCCGCGTG                       |
| R2-rsmAflag                                          | GAACTCGAGTCACTTGTGCATCATCCTTGTAATCATT                |
| F-hrpG                                               | CAGGATCCGCGATGCCCGATGACTGTACG                        |
| R-hrpG                                               | TATAAGCTTCGAGATCGGCAGCGGTG                           |
| Fwconst-hrpG                                         | ATAGGTACCATGCGTGGCTTGTACGCCGAC                       |
| R1-hrpG6His                                          | GATGGTGATGGCAGGCGGCTGCCGTGATGTGC                     |
| R2-hrpG6His                                          | CCCTCGAGTCAGTGATGGTGATGGTGATGGCAGG                   |
| F-hrcQ                                               | CTTAGGTACCGAGTTCTGCAACGCCACGCCAGTG                   |
| R1-hrpQFlag                                          | GTAATCGGCATCTGCATGCGTGCTCTCCGACAT                    |
| R2-hrpQFlag                                          | GTACTCCGAGTTACTTATCGTGCATCCTTGTAATCGGCATC            |
| <b>For 5' RACE</b>                                   |                                                      |
| hrpGSP1                                              | GTCTGCGCAATCGAAACGTCCAAG                             |
| hrpGSP2                                              | GAAGATCAGCAGCTCGCACGGC                               |
| hrpGSP3                                              | GCTGGCGTTGACCTGCGAGACC                               |
| hrpXSP1                                              | CTGGCACCGAACAACTGACCTCATC                            |
| hrpXSP2                                              | CGCGTCGCTGTTGGAGATGTTGC                              |
| hrpXSP3                                              | GGCCAAGCACCAACCAGCATCC                               |
| hrpBSP1                                              | CGTGTCCAGCGCCTTCAGCTCTGGCCG                          |
| hrpBSP2                                              | AGTACTCGGACTGCGGCCAGGACC                             |
| hrpCSP1                                              | TGGTCGGAGAAGTAGTCGCCGCGCCG                           |
| hrpCSP2                                              | CATGACCATTAGCGCGCCAAAGAGC                            |
| hrpDSP1                                              | GTTCAAGTAGCAGCGCCAGGCCGTCG                           |
| hrpDSP2                                              | CGGTGTCCAACCTGCAGGCGCAGGC                            |
| hrpESP1                                              | GCTAGCATGGCACCCACCGCAGTAC                            |
| hrpESP2                                              | GCAAGACTTTGCGCCTGGACGTGC                             |
| hrpFSP1                                              | GACGGCAGATCGGAGTCATCCTTGGA                           |
| hrpFSP2                                              | GAATCCGACCCCAACAGCTCCGAC                             |
| <b>For translational and transcriptional fusions</b> |                                                      |
| gusA-Fw                                              | ATGTTACGTCCTGTAGAAACCCCAACCCGTG                      |
| gusA-R                                               | GTAAGCTTCATTGTTTGCCTCCCTGCTGCG                       |
| hrpG-Fw                                              | CTTGGTACCTCACTCTGTCAAACATCCATGTGATG                  |
| hrpG-R                                               | GGGTTTCTACAGGACGTAACATGGGAGAGTGGTCGTTTATTAGG         |
| hrpX-Fw                                              | GTAATGGTACCGTCCGCGAGGTCTAGACCAACC                    |
| hrpX-R                                               | GTTGGGGTTTCTACAGGACGTAACCAAGCACCAACCAGCATCCTG<br>C   |
| hrpA-Fw                                              | GATTGGTACCTGGTGGATCTAGCGATCGGCCTGG                   |
| hrpA-R                                               | GTTGGGGTTTCTACAGGACGTAACATCAGGACGGCCCAATGGA<br>G     |
| hrpB-Fw                                              | GATTGGTACCGACATTGCCCTCTCCTTCCGCG                     |
| hrpB-R                                               | GTTGGGGTTTCTACAGGACGTAACAGTACTCGGACTGCGGCCAGG<br>AC  |
| hrpC-Fw                                              | GTATGGTACCTGAATCTTGTCATGGGTGAGTCCGACC                |
| hrpC-R                                               | GTTGGGGTTTCTACAGGACGTAACATTAGCGCGCCAAAGAGCAC         |
| hrpD-Fw                                              | CTTAGGTACCGAGTTCTGCAACGCCACGCCAGTG                   |
| hrpD-R                                               | GTTGGGGTTTCTACAGGACGTAAGATGCGACGGCGATGCGTGGCC<br>AAG |
| hrpE-Fw                                              | GTCGAATTCGAGCTGATGCCGTGAGAGTTGG                      |
| hrpE-R                                               | GTTGGGGTTTCTACAGGACGTAAGGCATCGAACATAGTGGACTCT<br>C   |
| hrpG5UTR-F                                           | CGGGTCCCGCAATGGTACATACC                              |
| hrpB5UTR-F                                           | TGCTTCCGAAAGGATCCGGCC                                |
| hrpC5UTR-F                                           | CTGTCAAGCGGATCGTTCCACCACAGCT                         |
| hrpD5UR-F                                            | GAAGGCTGCGTCTGGAGGCTGCACT                            |
| hrpE5UTR-F                                           | AGGTCGTTACACCCTGGGGAGCGAT                            |
| <b>For expression of rsmA in pET28a and pBRA</b>     |                                                      |
| F-pETrsmA                                            | GAGATTTGCAAACATATGTTGATCCTCACTCGCCG                  |
| R-pETrsmA                                            | CTAACGTAAACCCTTGAATTC AACGATCAATTGGAAG               |

---

**For site-direct mutagenesis**

hrpGD41N-F AATGTCTCGACGTTTTCTAATGAACTGGAGCTTTTGCCTACGCTGC  
GGC  
hrpGD41N-R GCCGCAGCGTACGCAAAAGCTCCAGTTCATTAGAAAACGTCGAGA  
CATT  
hrpGE44K-F ACGTTTTCCGATGAACTGAAGCTTTTGCCTACGCT  
hrpGE44K-R AGCGTACGCAAAAGCTTCAGTTCATCGGAAAACGT  
hrpGD60N-F CTGATCTCAATGCCAGCTATGTCGCCGCCGATGACAGTT  
hrpGD60N-R CTGGCATTGAAGATCAGCAGCTCGCACGGCGAATG  
hrpGBS1-TTA-F TCGTCCAGCTCCGCTTACTCTCCCCGCCAAC  
hrpGBS1-TTA-R GTTGGCGGGGAGAGTAAAGCGGAGCTGGACGA  
hrpGBS2-TTA-F GATGCAGCGATCTTTGAAGATTTATTTGTCCTGGCATTGG  
hrpGBS2-TTA-R CCAATGCCAGGACAAAATAAATCTTCAAAGATCGCTGCATC  
hrpGΔBS2-F AGCGATAAGCTTCATTGGCCGACCAGCACCG  
hrpGΔBS2-R AAGCTTATCGCTGCATCGTCGGACCAGTCCG

**For in vitro transcription**

hrpG5UTR-F CGGGTCCCCGCAATGGTACATACC  
hrpG5UTR-R CGTTGGGGGGAGAGTGGTCGTCAT  
hrpD5UTR-F GAAGGCTGCGTCTGGAGGCTGCACT  
hrpD5UTR-R ACCCTGCTCAGCTGTGCGCGCTC  
hrpE5UTR-F AGGTCGTTACACCCTGGGGAGCGAT  
hrpE5UTR-R TGCAGAAAGCGCTAGCATGGCACC  
hrpG5UTR-T7-F TAATACGACTCACTATAGGGGTCCCAGCAATGGTACATAC  
hrpG5UTR-T7-R GGAGAGTGGTCGTCATTTAGCGCGCCTTCG  
hrpD5UTR-T7-F TAATACGACTCACTATAGGGAAGGCTGCGCTGGAGGCTG  
hrpD5UTR-T7-R TGATACCCTGCTCAGCTGTGCGCGCTCGG  
hrpG5UTR-R-81 AAGCTTATCGCTGCATCGTCGGACCAGTCCG  
hrpG5UTR-T7-F-54 TAATACGACTCACTATAGGGCAACCGACTGGTCCGACGATG

**For qRT-PCR**

hrpE<sub>XAC0397</sub>-F TCGTTGATCAGTGACATGAACGCC  
hrpE<sub>XAC0397</sub>-R GATGAACTTGTTTCAGCGCCACGTT  
hrpD6<sub>XAC0398</sub>-F TCGATGCCATGACCGATACG  
hrpD6<sub>XAC0398</sub>-R TTGAAGTCGTTGCGTGAGGT  
hrpD5<sub>XAC0399</sub>-F GTCCGTTACAACGGCAATGG  
hrpD5<sub>XAC0399</sub>-R TTCGACATAATGCAGGCCCGT  
hrcS<sub>XAC0401</sub>-F CCACGACGATCTAGTGGAT  
hrcS<sub>XAC0401</sub>-R ACATCACCCTGGATGAAG  
hrcQ<sub>XAC0403</sub>-F CAGCAGGATAACGTTTGAGCC  
hrcQ<sub>XAC0403</sub>-R TTCGCCACTGTCACTAACC  
hrcU<sub>XAC0406</sub>-F TGATCATTGGCCTTGCCCTACCAGA  
hrcU<sub>XAC0406</sub>-R TTGCTATTGCTTTGTCGCGGATG  
hrpB1<sub>XAC0407</sub>-F ACCCATGACAAGATTCAGGACCGCT  
hrpB1<sub>XAC0407</sub>-R CTTCCACGTAATTACCGCGCTTGA  
hrpB2<sub>XAC0408</sub>-F CCGGCACCAGTATTACCTCC  
hrpB2<sub>XAC0408</sub>-R ATCGATATGCTCGGCGATGG  
hrcC<sub>XAC0415</sub>-F ATACGTGCGGACAACAAGGATCT  
hrcC<sub>XAC0415</sub>-R CGGAGATGTTTGAATTTGCCGCT  
hpa1<sub>XAC0416</sub>-F ATTCTTTGAACACACAGCTCGGCG  
hpa1<sub>XAC0416</sub>-R TCGGCATTGTTGCTCTGCTGAA  
hpa2<sub>XAC0417</sub>-F ACAACAACGGCACGGTTGATTACG  
hpa2<sub>XAC0417</sub>-R ACTGCAGCCCAGGTATTTCCGTAT  
hrpG<sub>XAC1265</sub>-F ATCGTGCTTGGACGTTTTCGATTGC  
hrpG<sub>XAC1265</sub>-R ATTGAAAGGCAGCGCAAGGACTTC  
hrpX<sub>XAC1266</sub>-F AGCGATCTCTGCGTTGTCTAC  
hrpX<sub>XAC1266</sub>-R ATACGCATCTTCGGCCTCTTCTCTGA  
16S-F CGCTTTCGTGCCTCAGTGTCAAGTGTGG  
16S-R GGCGTAAAGCGTGCCTAGGTGGTGGTT

---

Restriction enzyme sites used in this study are underline in the primer sequences.
