# Supplementary material for: The Post-transcriptional Regulator rsmA/csrA Activates T3SS by Stabilizing the 5′ UTR of hrpG, the Master Regulator of hrp/hrc Genes, in Xanthomonas
Source: PubMed Central journal article supplement (PMC3937308; doi:10.1371/journal.ppat.1003945), 2014-02-27
Supplement: ppat.1003945.s007.pdf [file ppat.1003945.s007.pdf]

**Table S4. RNA probes encoding 5'-UTR of *hrp* genes and control used in this study.**

| <b>Name</b>          | <b>Sequence (5' to 3')</b>                        | <b>Reference</b>           |
|----------------------|---------------------------------------------------|----------------------------|
| <b>Control R9-43</b> | GGGAAUUC AACUCCAUCUAGGCACAAGGAUGGCCAUAGUACUCAAGCU | Dubey <i>et al.</i> , 2005 |
| <b>hrpG1</b>         | AUUCGUCCAGCUC CGCUGGACUCUC                        | This study                 |
| <b>hrpG2</b>         | ACGAUGCAGCGAUCUUUGAAGAUGGAUUUUGUCCUGGCAUUG        | This study                 |
| <b>hrpX</b>          | GUUAGGC GCCUGUUGUCUUUUGCUC CGCCCCCAAAGAGAGAGAC    | This study                 |
| <b>hrpB</b>          | GUGUACGGUCCGCAUGUCAUUAAAACGAGGUGCAGUGUG           | This study                 |
| <b>hrpC</b>          | GCGCAGCGAUCGCGGAAGGAGAGGGCAAUG                    | This study                 |
| <b>hrpF</b>          | GCCCAUCGCGCAGAUUGGCAACAUACGGCUACACCGCAUG          | This study                 |
